# Supplementary material for: Production of 40 Ar by an overlooked mode of 40 K decay with implications for K-Ar geochronology
Source: Copernicus journal article supplement (doi:10.5194/gchron-2-355-2020), 2020-11-26
Supplement: Supplementary file 2 [file gchron-2-355-2020-supplement.zip]

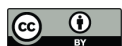

## *Supplement of*

# **Production of $^{40}\text{Ar}$ by an overlooked mode of $^{40}\text{K}$ decay with implications for K-Ar geochronology**

**Jack Carter et al.**

*Correspondence to:* Jack Carter ([j.carter.1@research.gla.ac.uk](mailto:j.carter.1@research.gla.ac.uk))

- [gchron-2-355-2020-supplement-title-page.pdf](#)
- [Potassium\\_counting\\_experiment.csv](#)
- [supplement.pdf](#)

The copyright of individual parts of the supplement might differ from the CC BY 4.0 License.
