# Supplementary material for: Production of 40 Ar by an overlooked mode of 40 K decay with implications for K-Ar geochronology
Source: Copernicus journal article supplement (doi:10.5194/gchron-2-355-2020), 2020-11-26
Supplement: Supplementary file 3 [file gchron-2-355-2020-supplement.zip]

Archive with 3 entries (3 files):
- Potassium_counting_experiment.csv
- supplement.pdf
- gchron-2-355-2020-supplement-title-page.pdf
