# Supplementary material for: Production of 40 Ar by an overlooked mode of 40 K decay with implications for K-Ar geochronology
Source: Copernicus journal article supplement (doi:10.5194/gchron-2-355-2020), 2020-11-26
Supplement: Supplementary file 3 [file gchron-2-355-2020-supplement.zip › Potassium_counting_experiment.csv]

Channel Number	160217c- Am241 Calibration	280217Am- Am241 Spectra on Dspec 50	060217a- KCL 600mg in a greased thin petri dish	080217a- Background	Energy calibration
1	0	0	0	0	Linear Model
2	0	0	0	0
3	0	0	0	0	m = 0.0017343
4	0	0	0	0	c = 0.0117156
5	0	0	0	0	y = m*channel number + c
6	0	0	0	0
7	0	0	0	0
8	0	0	0	0
9	0	0	0	0
10	0	0	0	0
11	0	0	0	0
12	0	0	0	0
13	0	0	0	0
14	0	0	0	0
15	0	0	0	0
16	0	0	0	0
17	0	0	0	0
18	0	0	0	0
19	0	0	0	0
20	0	0	0	0
21	0	0	0	0
22	0	0	0	0
23	0	0	0	0
24	0	0	0	0
25	0	0	0	0
26	0	0	0	0
27	0	0	0	0
28	0	0	0	0
29	0	0	0	0
30	0	0	0	0
31	0	0	0	0
32	0	0	0	0
33	0	0	0	0
34	0	0	0	0
35	0	0	0	0
36	0	0	0	0
37	0	0	0	0
38	0	0	0	0
39	0	0	0	0
40	0	0	0	0
41	0	0	0	0
42	0	0	0	0
43	0	0	0	0
44	0	0	0	0
45	0	0	0	0
46	0	0	0	0
47	0	0	0	0
48	0	0	0	0
49	0	0	0	0
50	0	0	0	0
51	0	0	0	0
52	0	0	0	0
53	0	0	0	0
54	0	0	0	0
55	0	0	0	0
56	0	0	0	0
57	0	0	0	0
58	0	0	0	0
59	0	0	0	0
60	0	0	0	0
61	0	0	0	0
62	0	0	0	0
63	0	0	0	0
64	0	0	0	0
65	0	0	0	0
66	0	0	0	0
67	0	0	0	0
68	0	0	0	0
69	0	0	0	0
70	0	0	0	0
71	0	0	0	0
72	0	0	0	0
73	0	0	0	0
74	0	0	0	0
75	0	0	0	0
76	0	0	0	0
77	0	0	0	0
78	0	0	0	0
79	0	0	0	0
80	0	0	0	0
81	0	0	0	0
82	0	0	0	0
83	0	0	0	0
84	0	0	0	0
85	0	0	0	0
86	0	0	0	0
87	0	0	0	0
88	0	0	0	0
89	0	0	0	0
90	0	0	0	0
91	0	0	0	0
92	0	0	0	0
93	0	0	0	0
94	0	0	0	0
95	0	0	0	0
96	0	0	0	0
97	0	0	0	0
98	0	0	0	0
99	0	0	0	0
100	0	0	0	0
101	0	0	0	0
102	0	0	0	0
103	0	0	0	0
104	0	0	0	0
105	0	0	0	0
106	0	0	0	0
107	0	0	0	0
108	0	0	0	0
109	0	0	0	0
110	0	0	0	0
111	0	0	0	0
112	0	0	0	0
113	0	0	0	0
114	0	0	0	0
115	0	0	0	0
116	0	0	0	0
117	0	0	0	0
118	0	0	0	0
119	0	0	0	0
120	0	0	0	0
121	0	0	0	0
122	0	0	0	0
123	0	0	0	0
124	0	0	0	0
125	0	0	0	0
126	0	0	0	0
127	0	0	0	0
128	0	0	0	0
129	0	0	0	0
130	0	0	0	0
131	0	0	0	0
132	0	0	0	0
133	0	0	0	0
134	0	0	0	0
135	0	0	0	0
136	0	0	0	0
137	0	0	0	0
138	0	0	0	0
139	0	0	0	0
140	0	0	0	0
141	0	0	0	0
142	0	0	0	0
143	0	0	0	0
144	0	0	0	0
145	0	0	0	0
146	0	0	0	0
147	0	0	0	0
148	0	0	0	0
149	0	0	0	0
150	0	0	0	0
151	0	0	0	0
152	0	0	0	0
153	0	0	0	0
154	0	0	0	0
155	0	0	0	0
156	0	0	0	0
157	0	0	0	0
158	0	0	0	0
159	0	0	0	0
160	0	0	0	0
161	0	0	0	0
162	0	0	0	0
163	0	0	0	0
164	0	0	0	0
165	0	0	0	0
166	0	0	0	0
167	0	0	0	0
168	0	0	0	0
169	0	0	0	0
170	0	0	0	0
171	0	1	0	0
172	0	0	0	0
173	0	2	0	0
174	0	2	0	0
175	0	1	0	0
176	0	0	0	0
177	0	1	0	0
178	0	1	0	0
179	0	5	0	0
180	0	6	0	0
181	0	9	0	0
182	0	12	0	0
183	0	17	0	0
184	0	24	0	0
185	0	34	0	1
186	0	49	0	0
187	0	61	0	0
188	0	94	0	0
189	0	111	0	0
190	0	134	0	0
191	0	171	0	0
192	0	239	0	0
193	0	280	0	0
194	0	351	0	0
195	0	433	2	6
196	0	552	5	16
197	0	641	11	46
198	0	816	49	61
199	0	884	106	106
200	0	1098	160	102
201	0	1170	167	101
202	0	1355	196	71
203	0	1579	137	63
204	0	1802	137	64
205	0	1811	104	40
206	0	1963	88	57
207	0	2096	92	48
208	0	2166	84	56
209	0	2389	95	44
210	0	2433	87	49
211	0	2447	106	50
212	0	2470	82	76
213	0	2613	65	54
214	0	2555	98	45
215	0	2548	85	53
216	0	2485	82	53
217	0	2360	83	65
218	0	2376	103	56
219	0	2263	91	55
220	0	2195	91	50
221	0	2043	87	54
222	0	1976	92	48
223	0	1905	95	62
224	0	1748	94	57
225	0	1657	90	54
226	0	1505	85	65
227	0	1391	86	57
228	0	1296	81	55
229	0	1251	81	62
230	0	1179	96	67
231	0	1099	83	58
232	0	1061	80	62
233	0	941	77	64
234	0	859	80	61
235	0	804	95	79
236	0	756	79	68
237	0	721	93	73
238	0	705	99	65
239	0	687	95	74
240	0	661	83	73
241	0	589	91	62
242	0	572	107	71
243	0	543	108	76
244	0	567	106	89
245	0	512	134	87
246	0	456	118	112
247	0	478	104	123
248	0	455	115	113
249	0	455	137	131
250	0	428	135	171
251	0	425	135	181
252	0	441	131	204
253	0	408	145	206
254	0	383	184	250
255	0	374	161	286
256	0	416	226	306
257	0	386	268	322
258	0	349	298	348
259	0	361	314	342
260	0	323	366	348
261	0	300	426	270
262	0	307	477	280
263	0	316	483	315
264	0	333	482	268
265	0	290	487	300
266	0	258	505	264
267	0	305	486	254
268	0	287	441	219
269	0	309	450	218
270	0	252	401	260
271	0	262	421	250
272	0	249	391	235
273	0	274	401	224
274	0	266	344	205
275	0	256	386	213
276	0	260	344	186
277	0	208	362	194
278	0	249	337	191
279	0	202	303	166
280	0	231	310	194
281	0	210	302	177
282	0	214	310	161
283	0	214	304	160
284	0	187	270	142
285	0	203	279	137
286	0	205	297	148
287	0	192	242	131
288	0	190	236	144
289	0	174	271	126
290	0	160	229	105
291	0	189	221	113
292	0	176	231	123
293	0	198	175	122
294	0	203	198	107
295	0	168	195	102
296	0	193	194	101
297	0	155	184	117
298	0	177	195	111
299	0	154	164	85
300	0	143	165	107
301	0	156	165	85
302	0	184	175	77
303	0	173	144	68
304	0	161	155	71
305	0	148	156	83
306	0	152	140	59
307	0	150	119	82
308	0	157	131	63
309	0	161	127	67
310	0	129	131	78
311	0	148	104	67
312	0	159	116	59
313	0	141	119	59
314	0	149	116	48
315	0	176	114	67
316	0	156	111	64
317	0	142	93	48
318	0	136	86	48
319	0	140	113	51
320	0	132	97	51
321	1	156	89	50
322	0	126	97	42
323	1	140	91	57
324	2	150	79	39
325	2	121	83	49
326	2	137	88	45
327	2	119	64	37
328	3	129	64	51
329	7	134	66	42
330	5	132	75	49
331	5	134	86	52
332	8	108	61	37
333	3	119	78	44
334	6	129	78	48
335	6	145	88	45
336	7	146	69	44
337	7	136	73	46
338	10	119	75	36
339	6	147	71	44
340	7	157	59	45
341	5	155	77	31
342	8	131	66	45
343	5	127	71	41
344	5	123	80	30
345	9	152	67	50
346	5	142	56	39
347	6	148	61	36
348	8	135	54	40
349	6	140	68	42
350	6	137	70	30
351	11	134	68	37
352	9	124	55	31
353	7	139	67	48
354	8	151	62	32
355	15	145	74	31
356	8	156	66	33
357	8	129	69	39
358	12	133	61	34
359	7	124	56	50
360	11	129	64	33
361	13	134	72	37
362	10	168	59	40
363	11	159	57	31
364	10	155	63	25
365	10	134	66	43
366	9	166	65	43
367	9	157	62	36
368	8	159	54	30
369	6	161	68	38
370	8	148	55	36
371	9	170	60	44
372	7	144	63	39
373	10	166	58	41
374	7	154	48	37
375	8	185	60	38
376	13	163	57	40
377	13	165	53	38
378	5	179	54	48
379	4	143	58	42
380	6	153	56	35
381	9	177	49	26
382	9	176	53	31
383	4	180	57	44
384	9	175	47	38
385	10	163	44	25
386	10	155	64	32
387	9	173	53	40
388	4	168	55	32
389	7	197	61	37
390	7	162	62	26
391	5	175	72	30
392	7	194	67	35
393	6	184	56	25
394	13	163	52	42
395	4	179	58	42
396	8	183	56	30
397	7	181	59	28
398	8	212	56	40
399	9	187	45	20
400	5	195	38	25
401	5	180	56	26
402	8	182	58	34
403	5	191	54	32
404	4	202	50	45
405	10	185	57	36
406	7	193	46	36
407	9	197	65	34
408	7	167	55	25
409	9	204	41	25
410	7	189	37	32
411	3	195	58	35
412	2	171	50	33
413	5	185	50	31
414	5	179	52	27
415	6	179	59	30
416	5	173	55	28
417	4	213	49	29
418	1	193	50	32
419	4	171	45	38
420	4	190	53	21
421	3	184	58	31
422	5	214	61	33
423	3	181	62	27
424	0	180	53	28
425	1	201	52	34
426	2	165	42	35
427	1	171	51	19
428	3	189	56	33
429	1	176	61	28
430	3	187	48	20
431	2	170	59	27
432	4	181	48	33
433	6	171	56	38
434	2	172	50	31
435	3	166	51	25
436	1	177	48	27
437	5	175	53	33
438	2	175	51	38
439	1	201	53	22
440	4	186	61	20
441	4	157	50	37
442	4	172	43	35
443	1	172	48	33
444	3	169	54	31
445	6	169	50	38
446	3	165	40	26
447	3	155	46	35
448	3	172	47	26
449	3	180	51	36
450	0	175	51	29
451	1	172	45	33
452	2	164	40	39
453	4	177	50	25
454	6	171	38	24
455	0	174	49	42
456	3	192	55	30
457	2	174	53	28
458	2	159	50	37
459	0	161	49	36
460	4	167	39	30
461	0	188	53	24
462	3	174	49	31
463	1	156	42	29
464	0	153	51	25
465	0	161	60	32
466	1	167	37	37
467	2	157	45	33
468	1	158	44	27
469	3	150	37	29
470	1	125	50	25
471	3	149	43	33
472	0	144	46	35
473	0	161	45	29
474	0	142	38	38
475	3	150	48	41
476	0	149	45	26
477	3	165	41	25
478	3	128	36	44
479	3	135	44	27
480	2	153	27	29
481	0	156	52	19
482	1	151	32	22
483	2	137	46	40
484	3	142	48	27
485	0	139	41	18
486	0	124	38	28
487	2	157	43	24
488	1	158	48	26
489	3	136	37	28
490	1	124	38	32
491	0	117	27	32
492	1	136	38	28
493	1	150	45	21
494	3	136	41	30
495	1	141	34	27
496	1	156	56	30
497	0	138	48	25
498	1	129	45	25
499	0	144	45	20
500	2	146	39	23
501	0	113	44	20
502	0	120	48	30
503	1	122	40	28
504	2	147	39	26
505	2	125	42	31
506	0	154	46	31
507	0	128	27	25
508	1	139	42	23
509	1	156	38	24
510	0	151	34	24
511	1	141	40	24
512	1	157	41	17
513	0	113	45	26
514	0	132	48	24
515	0	124	41	16
516	1	144	31	21
517	0	147	32	27
518	0	134	34	32
519	0	142	41	31
520	1	135	45	25
521	1	169	47	32
522	1	169	46	28
523	1	145	46	23
524	1	166	43	31
525	0	149	54	36
526	2	137	38	25
527	0	147	54	23
528	0	153	45	26
529	1	168	50	26
530	1	169	34	18
531	0	155	35	33
532	2	175	38	25
533	0	173	44	25
534	0	188	45	22
535	1	177	43	31
536	1	188	50	28
537	1	150	36	17
538	2	178	49	35
539	2	194	50	28
540	0	168	41	19
541	1	158	33	31
542	2	164	44	19
543	0	159	46	26
544	1	198	43	26
545	2	181	48	20
546	1	182	44	29
547	1	175	36	26
548	3	192	47	27
549	2	191	39	24
550	1	206	42	16
551	1	206	43	26
552	1	195	37	20
553	4	195	43	19
554	1	221	44	19
555	1	191	30	25
556	0	224	34	18
557	1	214	32	39
558	0	213	40	24
559	2	227	37	27
560	0	200	34	22
561	0	216	37	26
562	0	254	39	35
563	1	252	35	31
564	2	240	45	22
565	0	234	38	17
566	1	248	36	25
567	0	251	46	18
568	4	217	35	15
569	0	241	34	26
570	2	242	42	20
571	0	252	29	29
572	2	239	35	28
573	1	282	43	27
574	1	244	37	23
575	1	272	33	23
576	1	282	33	14
577	1	241	42	18
578	2	275	40	15
579	0	275	45	22
580	0	258	34	26
581	3	288	41	26
582	3	252	31	28
583	3	261	35	33
584	1	273	32	24
585	1	298	40	28
586	0	272	36	23
587	1	307	38	19
588	2	263	37	26
589	1	324	38	18
590	1	289	49	29
591	3	261	36	22
592	2	279	45	25
593	0	297	43	33
594	1	278	37	29
595	1	310	33	20
596	4	317	41	22
597	2	285	35	27
598	2	304	39	24
599	1	289	36	22
600	0	314	39	23
601	2	308	38	28
602	1	313	48	27
603	0	324	34	23
604	2	334	33	24
605	4	306	32	19
606	2	295	41	14
607	0	296	34	13
608	1	303	24	16
609	0	296	44	12
610	0	315	37	13
611	2	307	44	25
612	0	316	33	21
613	2	327	30	20
614	2	322	42	18
615	2	305	31	24
616	1	307	38	18
617	1	303	44	15
618	1	347	28	27
619	2	294	48	19
620	1	321	45	28
621	0	337	37	24
622	2	308	31	24
623	2	336	49	13
624	0	285	29	23
625	1	305	34	16
626	0	325	32	18
627	5	289	40	19
628	2	321	30	17
629	2	297	32	13
630	2	288	32	24
631	1	334	38	24
632	3	323	30	14
633	2	321	32	16
634	1	313	24	26
635	2	304	37	20
636	3	282	36	23
637	1	293	38	27
638	1	330	36	19
639	0	306	39	19
640	1	312	35	24
641	1	276	38	18
642	0	299	32	20
643	0	279	37	26
644	1	290	34	11
645	0	287	32	15
646	2	270	21	23
647	2	301	42	24
648	2	307	41	24
649	1	285	29	23
650	2	255	34	19
651	0	266	43	21
652	3	272	35	18
653	0	272	31	23
654	2	261	36	26
655	0	293	31	25
656	3	273	40	20
657	2	292	34	22
658	1	259	38	17
659	3	259	37	18
660	1	271	36	25
661	0	235	36	26
662	2	275	35	20
663	3	242	44	22
664	0	250	48	25
665	0	253	36	28
666	2	251	36	14
667	3	249	39	18
668	2	251	46	19
669	1	246	31	20
670	2	269	40	26
671	0	252	46	24
672	0	247	41	18
673	0	222	44	20
674	0	261	23	24
675	1	255	45	24
676	1	241	36	21
677	3	232	33	24
678	0	243	33	28
679	1	219	36	24
680	0	209	30	24
681	2	233	29	17
682	3	232	29	25
683	0	251	32	18
684	3	243	37	23
685	1	256	31	30
686	0	254	35	25
687	0	224	35	17
688	0	230	30	26
689	0	254	36	21
690	0	219	35	21
691	2	213	50	15
692	1	243	37	24
693	0	211	26	16
694	3	221	33	24
695	0	218	39	19
696	4	213	43	20
697	0	200	33	24
698	1	242	42	24
699	0	216	42	22
700	3	262	37	25
701	1	237	34	24
702	2	223	43	21
703	2	250	38	23
704	1	236	28	17
705	0	231	37	12
706	1	225	35	18
707	1	219	31	24
708	1	274	28	24
709	0	246	34	16
710	1	251	26	19
711	1	253	34	20
712	1	208	31	20
713	0	247	25	15
714	0	241	29	21
715	1	240	31	20
716	1	270	36	14
717	2	237	40	15
718	2	247	34	21
719	4	229	31	24
720	0	231	24	20
721	1	218	29	16
722	4	251	30	15
723	3	233	32	27
724	1	240	35	23
725	2	248	24	19
726	1	252	25	13
727	4	235	35	17
728	2	281	23	20
729	1	300	36	15
730	1	247	33	19
731	0	277	30	17
732	2	283	39	18
733	6	276	36	22
734	1	310	33	16
735	3	236	26	22
736	1	272	33	23
737	0	267	20	17
738	3	311	30	13
739	4	295	32	17
740	1	303	48	19
741	1	296	21	15
742	2	334	27	19
743	0	339	22	17
744	3	331	29	18
745	1	327	33	29
746	3	332	29	17
747	3	358	31	23
748	2	355	25	22
749	1	381	37	14
750	2	355	37	22
751	3	387	25	15
752	2	357	29	15
753	1	356	39	18
754	0	398	21	13
755	3	369	36	23
756	2	441	27	16
757	0	415	30	30
758	2	457	44	15
759	2	447	29	16
760	4	475	26	15
761	3	401	37	13
762	3	469	27	21
763	6	452	26	20
764	2	482	25	20
765	2	453	24	9
766	7	505	30	15
767	1	518	36	15
768	5	532	34	18
769	2	595	20	18
770	6	574	45	19
771	2	562	33	26
772	4	564	26	17
773	4	550	29	21
774	7	616	23	17
775	5	594	24	12
776	1	605	28	15
777	5	647	28	17
778	3	682	31	11
779	7	640	38	19
780	5	666	22	17
781	2	664	28	15
782	8	694	24	23
783	6	706	18	23
784	4	718	27	14
785	5	748	37	16
786	2	742	38	21
787	4	749	34	16
788	8	799	36	11
789	0	714	25	15
790	5	823	47	14
791	5	831	33	25
792	1	855	26	14
793	7	863	23	15
794	7	855	43	13
795	6	852	34	17
796	3	854	34	29
797	7	892	29	20
798	6	909	30	19
799	6	959	22	16
800	6	962	31	15
801	6	948	30	16
802	5	1046	25	13
803	5	912	25	13
804	4	983	31	13
805	9	1019	26	20
806	3	1045	21	19
807	5	1093	28	13
808	6	1103	33	9
809	4	1067	31	12
810	10	1100	25	12
811	7	1142	20	9
812	8	1199	26	20
813	1	1156	22	17
814	3	1082	29	16
815	6	1186	22	14
816	10	1140	37	9
817	6	1167	38	21
818	6	1209	19	26
819	6	1239	20	12
820	5	1291	29	16
821	2	1161	29	19
822	4	1186	24	16
823	6	1175	31	20
824	7	1225	24	10
825	7	1246	27	13
826	6	1233	29	32
827	10	1290	37	13
828	10	1305	28	18
829	10	1333	24	16
830	4	1296	34	15
831	6	1265	26	19
832	5	1383	30	16
833	10	1333	21	16
834	10	1347	28	15
835	3	1350	27	12
836	4	1379	23	16
837	5	1288	31	19
838	12	1259	30	13
839	7	1268	33	22
840	4	1368	24	18
841	10	1327	32	15
842	6	1381	28	9
843	10	1376	23	16
844	4	1277	22	16
845	4	1310	23	16
846	4	1368	28	16
847	6	1323	39	12
848	2	1339	30	18
849	3	1252	26	14
850	6	1324	26	22
851	7	1363	29	14
852	6	1307	28	24
853	6	1333	27	19
854	9	1314	32	14
855	6	1233	30	18
856	9	1227	35	17
857	7	1256	27	26
858	4	1289	35	21
859	9	1196	24	12
860	4	1292	23	16
861	5	1296	31	21
862	4	1214	30	20
863	5	1245	34	17
864	3	1217	35	30
865	10	1182	31	15
866	5	1188	32	21
867	4	1181	39	19
868	6	1158	26	24
869	4	1122	36	20
870	5	1111	35	19
871	4	1179	26	19
872	4	1144	30	23
873	3	1109	37	18
874	5	1136	30	30
875	3	1075	30	15
876	3	1096	32	24
877	4	991	32	24
878	5	1055	34	19
879	1	1038	30	33
880	7	997	38	22
881	7	986	27	23
882	3	957	47	20
883	2	1000	33	25
884	4	980	31	19
885	0	950	47	30
886	1	918	41	18
887	2	877	43	27
888	4	830	40	24
889	7	872	40	25
890	4	804	30	31
891	5	778	38	36
892	8	846	42	33
893	2	823	42	23
894	2	770	36	9
895	2	793	30	16
896	3	717	34	24
897	3	735	42	16
898	1	718	34	21
899	2	703	33	27
900	4	679	36	20
901	4	650	48	23
902	1	701	47	19
903	1	627	28	24
904	9	590	30	25
905	2	589	28	22
906	4	566	28	20
907	5	599	38	19
908	2	581	35	20
909	1	539	36	14
910	1	498	32	22
911	1	479	27	24
912	2	521	26	23
913	1	494	30	14
914	3	482	26	13
915	1	454	24	20
916	1	440	30	21
917	4	466	39	11
918	4	409	29	15
919	1	410	28	13
920	1	405	33	21
921	1	384	29	30
922	1	383	31	11
923	2	403	26	17
924	1	365	35	17
925	5	343	30	24
926	1	398	29	10
927	1	340	31	18
928	1	294	29	21
929	0	338	24	16
930	0	298	22	19
931	2	310	35	19
932	2	282	27	18
933	0	308	20	21
934	1	276	30	17
935	1	300	30	15
936	1	262	26	14
937	1	254	24	20
938	1	249	17	15
939	1	268	25	14
940	1	262	20	18
941	0	253	25	18
942	3	246	17	12
943	1	227	32	18
944	1	236	30	20
945	2	204	25	14
946	1	233	34	14
947	0	212	30	16
948	1	186	21	17
949	2	195	32	12
950	1	215	21	15
951	2	191	22	16
952	1	200	20	15
953	0	183	28	14
954	0	164	20	16
955	0	174	32	13
956	0	159	21	19
957	1	170	15	16
958	2	168	27	19
959	2	156	15	23
960	0	161	22	17
961	1	166	14	8
962	3	149	30	10
963	0	154	27	21
964	0	155	21	14
965	0	152	28	21
966	1	141	23	14
967	2	147	23	14
968	1	155	22	18
969	0	131	21	17
970	0	137	23	15
971	0	135	25	12
972	0	122	22	22
973	1	145	22	13
974	0	149	30	12
975	1	140	22	9
976	1	114	26	17
977	0	136	20	13
978	1	131	18	13
979	0	154	18	11
980	2	110	19	11
981	2	144	29	10
982	0	105	26	13
983	0	137	36	12
984	0	120	26	12
985	0	130	31	9
986	1	114	19	17
987	1	127	15	12
988	0	124	30	8
989	0	141	18	14
990	2	124	20	17
991	1	119	26	17
992	0	138	20	15
993	0	139	28	13
994	0	132	17	10
995	1	123	26	10
996	0	99	22	15
997	0	117	22	9
998	0	118	23	14
999	1	122	23	18
1000	0	126	16	11
1001	0	107	24	14
1002	0	137	29	7
1003	2	132	22	8
1004	1	114	17	15
1005	1	105	23	7
1006	0	104	35	12
1007	1	107	22	22
1008	0	115	25	8
1009	0	125	28	16
1010	0	125	24	19
1011	0	144	27	10
1012	1	110	16	13
1013	0	104	18	12
1014	0	140	19	11
1015	0	116	28	7
1016	1	128	20	8
1017	0	106	19	13
1018	0	110	19	13
1019	1	132	16	13
1020	0	115	22	9
1021	0	106	19	12
1022	0	125	19	18
1023	0	106	18	11
1024	1	115	22	21
1025	0	127	19	12
1026	1	115	21	20
1027	1	110	29	20
1028	0	100	26	15
1029	1	142	15	21
1030	1	107	25	17
1031	1	109	21	15
1032	1	104	17	17
1033	0	101	22	23
1034	0	113	24	14
1035	1	97	23	15
1036	0	102	20	13
1037	0	122	29	13
1038	0	111	18	13
1039	0	90	27	19
1040	0	107	19	20
1041	0	116	31	12
1042	0	98	21	10
1043	0	118	27	19
1044	1	106	15	12
1045	0	120	14	21
1046	0	118	13	9
1047	0	113	29	15
1048	0	125	13	14
1049	0	114	20	13
1050	1	120	17	14
1051	1	118	18	20
1052	1	115	22	19
1053	0	106	21	19
1054	0	134	24	21
1055	0	113	25	11
1056	0	100	18	13
1057	0	118	23	13
1058	0	115	16	15
1059	0	108	26	11
1060	2	125	18	13
1061	1	107	26	21
1062	0	103	24	11
1063	0	127	23	12
1064	0	116	22	13
1065	0	113	23	15
1066	1	103	29	13
1067	1	108	22	22
1068	0	123	29	10
1069	1	96	21	15
1070	1	119	28	19
1071	0	109	19	13
1072	2	127	23	18
1073	0	145	18	12
1074	0	95	20	13
1075	0	109	14	8
1076	0	124	24	14
1077	0	131	26	14
1078	0	123	16	6
1079	0	117	21	12
1080	0	121	16	22
1081	2	111	17	14
1082	0	117	24	12
1083	2	108	21	13
1084	1	125	17	13
1085	1	131	28	15
1086	1	111	22	15
1087	0	124	31	19
1088	0	122	36	14
1089	0	132	22	16
1090	0	128	30	20
1091	1	125	20	11
1092	0	105	24	12
1093	0	115	29	19
1094	0	118	28	14
1095	1	122	28	11
1096	0	119	23	23
1097	1	136	23	17
1098	0	126	26	18
1099	0	133	21	14
1100	0	116	31	19
1101	0	104	22	15
1102	1	139	24	13
1103	0	122	21	22
1104	0	117	25	18
1105	0	140	17	21
1106	1	143	32	23
1107	1	119	14	19
1108	0	136	25	17
1109	3	135	27	13
1110	0	139	24	19
1111	1	132	25	20
1112	0	134	24	17
1113	0	108	35	16
1114	1	121	23	19
1115	0	131	25	16
1116	0	124	27	13
1117	0	114	32	20
1118	1	103	18	14
1119	0	118	24	18
1120	1	155	26	16
1121	0	118	25	21
1122	1	125	33	15
1123	0	153	26	22
1124	1	138	31	18
1125	0	119	29	18
1126	1	150	22	17
1127	0	124	21	21
1128	0	121	26	16
1129	0	118	23	23
1130	0	132	19	10
1131	0	106	20	15
1132	0	135	21	15
1133	1	115	29	17
1134	0	132	30	15
1135	0	131	16	16
1136	1	128	18	16
1137	0	150	25	16
1138	3	135	22	24
1139	2	129	22	13
1140	1	143	22	13
1141	1	149	19	9
1142	0	142	26	15
1143	0	158	34	21
1144	0	154	23	8
1145	2	145	42	18
1146	1	145	18	19
1147	2	149	23	19
1148	0	137	22	18
1149	0	169	19	19
1150	2	173	28	16
1151	2	136	30	14
1152	0	148	21	20
1153	0	163	27	23
1154	0	146	17	14
1155	0	174	22	17
1156	0	135	26	14
1157	0	166	20	18
1158	0	158	23	13
1159	0	162	21	10
1160	0	152	25	11
1161	2	139	22	16
1162	0	182	14	11
1163	1	180	19	13
1164	0	162	24	16
1165	2	153	10	12
1166	1	195	17	11
1167	0	185	14	17
1168	2	171	21	15
1169	0	189	21	10
1170	0	184	21	10
1171	1	172	24	10
1172	0	204	14	16
1173	2	185	16	17
1174	1	198	18	9
1175	1	180	22	13
1176	2	211	19	19
1177	1	188	24	10
1178	1	182	15	17
1179	1	206	20	6
1180	3	197	14	10
1181	1	193	20	11
1182	0	210	23	10
1183	0	213	25	9
1184	1	207	22	19
1185	0	209	19	12
1186	2	220	23	9
1187	1	203	21	14
1188	0	214	27	9
1189	1	202	24	9
1190	2	231	18	10
1191	1	236	28	5
1192	0	216	24	6
1193	1	221	23	10
1194	1	221	28	11
1195	1	226	23	10
1196	2	211	11	11
1197	0	236	27	13
1198	1	249	29	14
1199	0	269	14	11
1200	1	219	16	15
1201	0	252	15	10
1202	2	250	25	13
1203	0	271	27	11
1204	2	239	27	11
1205	3	243	22	14
1206	3	249	24	12
1207	0	275	21	12
1208	0	259	26	16
1209	0	250	23	13
1210	3	234	23	11
1211	1	236	31	9
1212	1	268	19	11
1213	3	293	25	10
1214	1	268	27	8
1215	0	275	18	17
1216	0	277	15	12
1217	0	243	28	7
1218	1	250	29	5
1219	2	284	10	10
1220	0	289	18	11
1221	0	274	23	13
1222	2	292	22	19
1223	1	286	19	15
1224	0	265	19	19
1225	1	273	18	13
1226	0	280	16	2
1227	1	270	24	7
1228	1	278	15	10
1229	0	264	22	13
1230	2	320	16	5
1231	1	275	12	12
1232	2	280	19	19
1233	2	300	16	19
1234	0	288	10	6
1235	1	284	22	13
1236	2	291	25	9
1237	2	296	16	8
1238	2	266	24	17
1239	0	279	24	10
1240	1	331	15	15
1241	0	290	15	9
1242	0	283	27	10
1243	1	308	29	10
1244	1	302	26	8
1245	2	289	19	11
1246	1	290	20	19
1247	0	295	18	9
1248	0	294	18	13
1249	3	330	25	11
1250	1	297	17	8
1251	1	325	28	14
1252	0	327	18	8
1253	0	294	17	13
1254	1	318	22	9
1255	0	290	16	9
1256	1	309	21	14
1257	2	324	21	15
1258	0	308	22	8
1259	1	289	24	10
1260	2	297	17	9
1261	0	263	18	8
1262	3	293	23	16
1263	1	291	23	6
1264	1	321	17	12
1265	2	297	23	10
1266	0	277	14	8
1267	1	290	26	15
1268	1	277	26	21
1269	2	324	28	14
1270	0	316	21	11
1271	2	295	21	13
1272	1	291	18	16
1273	3	294	13	9
1274	2	310	23	11
1275	0	297	22	12
1276	1	291	19	10
1277	1	282	19	18
1278	0	298	21	7
1279	0	327	15	11
1280	1	281	16	14
1281	1	277	14	5
1282	1	289	23	12
1283	0	325	22	9
1284	1	290	20	5
1285	2	314	18	20
1286	0	297	27	13
1287	2	318	16	10
1288	0	301	22	13
1289	2	295	20	13
1290	0	319	21	12
1291	2	273	23	8
1292	1	276	15	15
1293	1	317	31	13
1294	0	321	20	12
1295	2	268	17	13
1296	0	287	13	10
1297	3	293	19	20
1298	3	294	22	11
1299	3	302	20	9
1300	1	307	27	17
1301	1	308	17	12
1302	2	288	24	13
1303	0	277	19	11
1304	2	305	24	17
1305	1	322	29	16
1306	2	255	22	13
1307	0	300	24	15
1308	1	309	36	20
1309	1	320	21	12
1310	0	320	7	9
1311	3	307	18	13
1312	3	272	17	6
1313	1	316	20	15
1314	1	281	18	17
1315	2	301	16	20
1316	2	274	29	22
1317	2	323	22	16
1318	0	284	22	13
1319	1	272	25	14
1320	0	271	25	24
1321	3	299	18	17
1322	0	320	16	14
1323	0	352	16	18
1324	3	350	22	14
1325	1	354	22	11
1326	0	321	23	8
1327	2	317	18	19
1328	3	326	24	11
1329	0	333	15	10
1330	1	350	23	12
1331	2	353	34	13
1332	1	348	17	17
1333	1	313	25	14
1334	1	358	16	14
1335	1	355	9	11
1336	2	372	21	14
1337	2	359	19	12
1338	1	367	20	9
1339	3	355	21	16
1340	3	362	22	11
1341	2	349	23	11
1342	3	339	26	21
1343	3	348	18	12
1344	4	368	19	9
1345	2	359	31	15
1346	1	368	24	10
1347	5	396	27	11
1348	1	386	25	13
1349	3	387	18	13
1350	3	409	24	15
1351	2	364	19	13
1352	0	378	18	12
1353	3	396	32	9
1354	4	445	23	10
1355	1	464	20	21
1356	1	421	24	19
1357	3	449	18	15
1358	3	453	18	4
1359	0	430	18	15
1360	0	467	23	15
1361	3	448	24	14
1362	4	464	13	18
1363	0	492	17	10
1364	2	503	23	27
1365	1	469	21	17
1366	2	494	14	20
1367	4	496	18	14
1368	2	473	16	13
1369	3	499	17	12
1370	1	470	27	16
1371	3	540	26	11
1372	3	505	23	13
1373	2	559	27	13
1374	2	591	16	19
1375	3	586	23	11
1376	2	524	21	11
1377	5	515	22	20
1378	4	552	18	17
1379	4	549	21	17
1380	5	579	24	12
1381	1	642	27	20
1382	3	618	23	15
1383	6	585	24	14
1384	4	622	15	16
1385	4	603	16	9
1386	2	627	27	11
1387	3	639	17	13
1388	2	629	15	22
1389	2	639	19	17
1390	1	677	20	19
1391	4	619	19	20
1392	2	631	21	16
1393	1	695	19	15
1394	1	697	25	11
1395	1	641	17	25
1396	3	685	14	19
1397	3	699	24	18
1398	2	638	31	13
1399	4	674	15	11
1400	3	678	13	14
1401	3	700	20	16
1402	6	725	28	9
1403	5	762	25	17
1404	3	739	20	12
1405	4	738	17	10
1406	1	752	18	20
1407	5	717	25	21
1408	4	747	29	16
1409	5	737	28	15
1410	2	772	23	11
1411	3	785	14	18
1412	1	799	14	14
1413	1	779	18	13
1414	3	786	10	10
1415	4	745	20	11
1416	2	855	22	12
1417	4	795	17	8
1418	1	810	21	18
1419	2	769	22	13
1420	2	808	10	17
1421	1	808	24	7
1422	3	842	19	10
1423	1	780	15	13
1424	3	862	15	7
1425	1	811	17	12
1426	0	823	22	17
1427	4	866	21	10
1428	4	825	20	11
1429	5	879	21	6
1430	4	839	16	10
1431	2	898	16	10
1432	4	833	23	17
1433	4	866	15	12
1434	4	903	18	6
1435	3	867	20	12
1436	5	895	12	11
1437	4	838	15	9
1438	2	892	23	7
1439	3	852	17	10
1440	2	859	14	12
1441	5	893	19	10
1442	1	872	29	6
1443	3	894	13	8
1444	7	893	12	15
1445	3	890	11	4
1446	1	909	22	14
1447	3	866	9	5
1448	1	979	21	12
1449	0	909	26	11
1450	2	861	21	11
1451	0	919	18	7
1452	2	933	21	10
1453	6	891	23	12
1454	2	857	16	10
1455	2	867	19	9
1456	4	833	15	12
1457	1	902	18	8
1458	1	908	14	11
1459	3	939	27	18
1460	1	858	20	10
1461	5	849	14	7
1462	1	873	22	13
1463	5	912	20	10
1464	1	916	16	9
1465	3	902	21	10
1466	4	934	19	13
1467	3	885	20	11
1468	3	852	16	16
1469	2	859	23	15
1470	0	922	18	10
1471	2	863	20	15
1472	2	878	21	9
1473	5	839	19	8
1474	2	852	14	14
1475	3	816	23	8
1476	5	866	21	7
1477	4	805	25	13
1478	4	842	18	16
1479	2	820	23	8
1480	1	777	16	6
1481	5	905	26	9
1482	2	778	24	7
1483	3	801	23	12
1484	1	817	23	10
1485	1	779	13	8
1486	1	761	11	3
1487	3	802	19	13
1488	1	729	21	7
1489	2	780	30	12
1490	5	802	12	8
1491	3	740	25	9
1492	0	764	10	12
1493	3	735	27	10
1494	2	720	12	14
1495	1	802	14	13
1496	5	778	25	7
1497	3	737	14	15
1498	2	723	17	7
1499	8	733	18	7
1500	2	735	28	12
1501	4	723	9	9
1502	4	727	20	7
1503	1	761	29	12
1504	3	732	19	8
1505	4	697	12	13
1506	6	685	17	13
1507	2	669	20	13
1508	1	673	19	8
1509	6	704	18	10
1510	4	703	14	11
1511	3	675	21	9
1512	2	697	19	9
1513	6	637	14	5
1514	2	722	16	12
1515	2	661	26	14
1516	0	684	28	12
1517	2	599	14	9
1518	3	624	13	8
1519	1	661	15	12
1520	4	602	12	10
1521	3	644	21	6
1522	5	642	11	8
1523	4	631	17	7
1524	2	629	18	11
1525	5	671	25	11
1526	9	622	25	12
1527	3	607	24	6
1528	4	616	16	14
1529	5	650	16	10
1530	4	665	24	12
1531	7	643	14	13
1532	4	623	30	5
1533	6	666	18	9
1534	4	665	11	6
1535	3	622	26	8
1536	6	678	17	13
1537	1	649	21	12
1538	2	690	19	7
1539	4	666	17	10
1540	2	670	15	13
1541	1	676	18	9
1542	3	668	14	2
1543	4	669	8	9
1544	2	690	14	10
1545	3	735	12	11
1546	1	673	15	9
1547	3	710	15	4
1548	2	700	24	9
1549	3	698	15	5
1550	5	767	9	11
1551	2	750	13	12
1552	8	714	18	10
1553	2	728	16	13
1554	2	776	16	15
1555	1	819	21	17
1556	8	801	16	8
1557	4	774	16	7
1558	6	793	17	8
1559	4	759	16	8
1560	5	833	20	12
1561	7	847	14	12
1562	3	817	17	6
1563	7	873	17	5
1564	5	899	15	5
1565	6	894	16	11
1566	7	895	18	10
1567	6	926	12	8
1568	11	891	10	11
1569	8	917	15	6
1570	9	954	13	7
1571	5	941	30	14
1572	5	977	20	7
1573	8	934	20	4
1574	3	1014	14	5
1575	2	1021	17	11
1576	6	1029	17	10
1577	9	1075	19	13
1578	7	1091	13	12
1579	6	1164	18	9
1580	5	1190	16	4
1581	9	1123	19	12
1582	14	1203	22	9
1583	8	1227	17	9
1584	7	1250	15	8
1585	6	1238	18	7
1586	8	1250	12	12
1587	9	1282	20	6
1588	7	1337	13	6
1589	9	1333	15	12
1590	5	1440	16	8
1591	3	1377	20	11
1592	14	1423	14	8
1593	7	1425	22	7
1594	5	1396	16	15
1595	4	1504	24	11
1596	10	1452	21	13
1597	6	1490	16	10
1598	9	1545	24	8
1599	3	1565	12	8
1600	5	1618	24	11
1601	9	1600	12	6
1602	8	1620	22	12
1603	7	1636	21	8
1604	6	1705	17	10
1605	7	1703	13	9
1606	8	1724	12	9
1607	12	1730	17	11
1608	10	1747	25	7
1609	13	1751	13	12
1610	3	1727	20	16
1611	9	1828	17	16
1612	15	1866	22	11
1613	7	1810	27	14
1614	7	1855	17	7
1615	3	1885	16	10
1616	4	1985	21	4
1617	5	1960	17	15
1618	10	1954	19	11
1619	11	1948	18	13
1620	10	2006	16	11
1621	10	2006	10	8
1622	4	2057	16	5
1623	8	2035	23	10
1624	8	2072	13	10
1625	6	2004	17	8
1626	9	2114	19	11
1627	15	2104	16	15
1628	2	2098	22	16
1629	8	2158	20	7
1630	10	2087	10	15
1631	7	2115	12	14
1632	8	2121	21	15
1633	10	2162	15	13
1634	9	2223	23	11
1635	7	2259	18	10
1636	5	2116	23	17
1637	6	2261	20	15
1638	4	2196	17	8
1639	10	2197	22	8
1640	8	2245	25	6
1641	7	2251	17	11
1642	8	2244	17	8
1643	2	2129	13	5
1644	9	2250	11	4
1645	7	2187	16	10
1646	2	2234	18	5
1647	5	2252	25	14
1648	8	2286	21	15
1649	5	2200	21	8
1650	4	2264	14	9
1651	8	2321	8	13
1652	4	2228	21	4
1653	6	2321	18	5
1654	5	2175	17	6
1655	4	2274	21	4
1656	8	2256	17	17
1657	12	2258	17	6
1658	2	2204	19	11
1659	0	2163	17	12
1660	6	2153	26	10
1661	5	2183	14	11
1662	9	2124	12	12
1663	0	2136	20	9
1664	4	2103	20	4
1665	7	2044	19	6
1666	2	2108	19	10
1667	4	2030	13	13
1668	4	2067	14	9
1669	4	2133	18	14
1670	5	2122	25	9
1671	5	2016	18	5
1672	1	1942	20	7
1673	3	1937	21	9
1674	1	1974	25	4
1675	6	1976	16	8
1676	6	1857	23	14
1677	6	1832	18	12
1678	3	1723	21	12
1679	3	1771	14	11
1680	3	1824	33	7
1681	5	1793	22	11
1682	2	1785	20	10
1683	7	1795	17	16
1684	4	1698	21	9
1685	6	1702	17	14
1686	3	1631	15	6
1687	5	1659	20	10
1688	5	1598	28	6
1689	5	1639	16	6
1690	6	1523	20	6
1691	4	1531	14	5
1692	3	1548	24	12
1693	1	1426	19	4
1694	4	1433	20	13
1695	6	1412	18	5
1696	7	1389	19	6
1697	4	1444	16	13
1698	5	1336	17	6
1699	4	1404	14	8
1700	5	1280	14	7
1701	3	1342	17	9
1702	3	1316	22	8
1703	2	1287	4	9
1704	3	1193	13	5
1705	3	1235	11	8
1706	5	1177	22	7
1707	5	1153	16	11
1708	0	1161	11	8
1709	5	1124	14	11
1710	6	1093	18	7
1711	2	1115	16	15
1712	3	1117	13	10
1713	3	1061	13	12
1714	4	1009	16	7
1715	2	990	10	7
1716	5	1001	18	8
1717	2	933	15	5
1718	1	905	10	4
1719	4	868	18	14
1720	6	818	18	8
1721	2	860	22	7
1722	1	851	17	12
1723	6	858	16	10
1724	3	787	16	11
1725	4	805	17	7
1726	2	726	18	6
1727	6	756	19	4
1728	5	742	11	12
1729	2	736	19	9
1730	3	679	14	9
1731	3	694	16	6
1732	4	671	22	7
1733	1	631	18	10
1734	6	557	13	14
1735	1	615	18	7
1736	1	616	15	9
1737	5	584	18	11
1738	3	504	10	10
1739	4	545	15	9
1740	2	577	15	4
1741	5	534	19	10
1742	4	501	16	7
1743	3	489	17	11
1744	6	486	17	4
1745	2	468	13	9
1746	3	449	15	9
1747	3	489	14	9
1748	6	455	16	7
1749	3	452	17	7
1750	3	404	15	6
1751	3	411	8	11
1752	5	390	23	7
1753	1	390	16	9
1754	2	382	16	8
1755	5	361	18	6
1756	3	423	17	8
1757	3	387	21	6
1758	4	324	14	7
1759	1	346	16	14
1760	0	329	11	14
1761	1	358	15	9
1762	3	347	20	4
1763	1	322	14	14
1764	3	308	16	15
1765	0	335	12	10
1766	2	307	13	9
1767	4	317	16	8
1768	3	299	12	4
1769	3	310	14	6
1770	0	296	22	3
1771	1	309	18	10
1772	4	283	14	4
1773	3	269	19	7
1774	3	259	10	7
1775	0	259	17	7
1776	5	263	16	10
1777	0	243	22	7
1778	2	232	18	9
1779	7	302	16	9
1780	0	267	11	7
1781	2	256	13	8
1782	2	255	11	13
1783	3	260	24	7
1784	4	252	14	8
1785	2	234	13	5
1786	6	248	17	11
1787	2	250	16	11
1788	1	255	20	11
1789	2	264	15	7
1790	1	247	10	7
1791	2	232	12	1
1792	1	249	19	7
1793	5	243	19	6
1794	3	261	19	9
1795	2	232	13	10
1796	5	224	14	6
1797	2	232	19	2
1798	0	239	19	9
1799	2	267	10	9
1800	4	257	12	7
1801	1	238	23	5
1802	5	266	14	8
1803	1	256	13	6
1804	2	231	14	7
1805	2	221	14	14
1806	1	242	18	13
1807	1	242	18	8
1808	4	237	16	7
1809	3	264	24	2
1810	2	246	24	10
1811	0	254	15	8
1812	2	251	11	7
1813	2	256	16	6
1814	1	264	8	9
1815	3	250	25	8
1816	1	274	12	7
1817	0	248	17	15
1818	3	244	18	11
1819	3	256	13	8
1820	3	246	10	9
1821	3	258	17	9
1822	1	274	20	8
1823	2	259	14	10
1824	3	250	18	7
1825	0	247	13	12
1826	2	278	12	14
1827	1	287	18	7
1828	2	281	11	2
1829	0	271	23	8
1830	0	267	15	7
1831	0	230	7	10
1832	1	233	13	5
1833	2	255	15	8
1834	1	276	11	9
1835	1	283	9	9
1836	2	252	15	12
1837	0	268	15	3
1838	0	257	15	8
1839	2	282	15	8
1840	2	279	16	6
1841	0	282	8	12
1842	1	293	20	9
1843	3	269	16	8
1844	0	287	12	11
1845	2	250	15	13
1846	1	271	12	6
1847	1	296	8	6
1848	0	261	13	8
1849	1	239	16	10
1850	2	257	12	7
1851	2	245	9	6
1852	1	246	15	5
1853	0	272	16	7
1854	1	269	10	8
1855	1	270	14	5
1856	1	262	14	8
1857	0	286	12	11
1858	1	272	14	7
1859	2	285	22	3
1860	2	232	13	4
1861	3	242	12	7
1862	0	237	17	9
1863	1	252	22	10
1864	2	274	9	7
1865	2	255	14	11
1866	1	240	17	11
1867	3	234	18	5
1868	1	251	24	2
1869	1	279	15	5
1870	3	241	21	13
1871	2	268	15	10
1872	1	260	20	10
1873	2	253	11	8
1874	3	235	12	5
1875	2	273	14	16
1876	0	256	17	6
1877	2	261	22	2
1878	1	246	19	12
1879	0	238	11	12
1880	0	245	10	12
1881	1	257	18	9
1882	1	238	16	7
1883	2	252	24	13
1884	1	239	15	8
1885	1	223	16	7
1886	0	231	16	7
1887	1	212	14	12
1888	0	227	20	8
1889	0	255	17	6
1890	0	241	15	10
1891	2	241	18	9
1892	1	214	13	14
1893	1	240	17	5
1894	0	227	15	6
1895	0	215	17	5
1896	0	221	19	13
1897	1	188	14	3
1898	1	229	14	6
1899	1	190	11	6
1900	4	209	20	13
1901	0	207	10	10
1902	2	214	9	10
1903	1	247	8	5
1904	1	206	13	10
1905	2	231	13	8
1906	0	190	14	12
1907	0	219	14	8
1908	1	215	19	10
1909	2	214	11	10
1910	3	187	15	8
1911	1	194	18	8
1912	2	192	17	7
1913	1	181	10	8
1914	0	216	17	10
1915	3	194	15	4
1916	1	197	19	10
1917	0	195	21	5
1918	2	199	11	13
1919	0	200	12	11
1920	2	182	22	8
1921	2	189	10	7
1922	2	188	13	10
1923	1	172	10	9
1924	0	190	10	6
1925	1	194	15	9
1926	1	168	19	7
1927	0	220	18	5
1928	0	208	10	11
1929	2	167	11	10
1930	0	185	14	6
1931	2	201	23	4
1932	0	189	10	7
1933	1	182	11	1
1934	0	167	11	6
1935	2	168	14	6
1936	0	192	14	3
1937	0	172	9	13
1938	1	172	20	6
1939	0	190	20	10
1940	1	178	23	12
1941	3	168	16	11
1942	3	171	16	6
1943	1	194	20	9
1944	0	172	18	7
1945	0	159	12	3
1946	0	181	15	6
1947	1	193	21	6
1948	1	170	14	7
1949	2	212	15	15
1950	3	169	13	6
1951	1	183	13	3
1952	1	199	17	3
1953	1	201	14	3
1954	2	199	8	10
1955	1	226	11	7
1956	0	181	19	6
1957	0	194	15	7
1958	1	183	20	7
1959	1	208	17	8
1960	2	192	15	9
1961	3	194	9	3
1962	1	161	20	6
1963	0	175	12	10
1964	0	186	11	7
1965	0	204	19	12
1966	1	193	15	9
1967	0	201	15	10
1968	2	191	12	4
1969	1	179	17	7
1970	0	203	13	6
1971	0	212	14	10
1972	1	205	16	5
1973	1	198	16	4
1974	0	180	11	17
1975	0	196	8	6
1976	2	199	12	12
1977	1	192	19	4
1978	1	214	15	10
1979	0	215	18	13
1980	3	201	19	8
1981	2	203	14	7
1982	0	185	15	8
1983	0	188	10	5
1984	2	212	16	12
1985	1	226	16	8
1986	2	221	26	7
1987	2	233	13	12
1988	1	223	13	4
1989	0	229	15	9
1990	2	227	14	10
1991	3	201	12	6
1992	1	219	13	6
1993	1	222	19	11
1994	1	229	22	11
1995	1	219	19	9
1996	3	232	14	8
1997	1	239	15	10
1998	2	230	21	10
1999	0	228	16	8
[truncated: 14,385 more rows]
